35 activity robustly regulates OPC proliferation, oligodendrogenesis, and myelin sheath thickness  
36 in both juvenile and adult rodents <sup>5-7</sup> and also influences axon selection during developmental  
37 myelination in zebrafish <sup>8,9</sup>. These activity-regulated responses of oligodendroglial cells have  
38 been shown to confer adaptive changes in motor function <sup>5</sup>, are necessary for some forms of  
39 motor learning <sup>10,11</sup> and contribute to cognitive behavioral functions such as attention and short-  
40 term memory <sup>12</sup>. Appreciation for this plasticity of myelin has stoked interest in the axon->glial  
41 synapse as a means by which OPCs could detect and integrate activity-dependent neuronal  
42 signals. Here, we employ a modified rabies virus-based monosynaptically-restricted trans-  
43 synaptic retrograde tracing strategy to elucidate a map of neuronal synaptic inputs to OPCs in  
44 the corpus callosum (CC), secondary motor cortex (MOs), and primary somatosensory cortex  
45 (SSp) *in vivo*. We find brain-wide, functionally-interconnected inputs to OPCs and that the  
46 degree of this connectivity is stable across brain region and is maintained despite whisker  
47 trimming-induced sensory deprivation in barrel cortex.

48

## 49 **RESULTS**

### 50 Development and validation of retrograde monosynaptic OPC tracing strategy

51 Owing to the lack of viral tools to achieve specific transgene expression in OPCs, we employed  
52 a transgenic strategy by crossing *Pdgfra::CreER* mice <sup>13</sup>, which permit OPC-specific Cre  
53 recombinase expression, with a Cre-inducible RABVgp4/TVA mouse <sup>14</sup>. Offspring of this cross  
54 express rabies virus glycoprotein 4 and the avian TVA receptor specifically in OPCs upon  
55 tamoxifen administration (*Pdgfra::CreER*-(gp4-TVA)<sup>f1</sup>). Subsequent stereotaxic injection of  
56 ASLV-A (EnvA)-pseudotyped gp4-deleted rabies virus encoding EGFP (SADΔG-EGFP(EnvA))  
57 achieves cell-specific, Cre-dependent labeling of OPC starter cell populations (Figure 1A). Virus  
58 can then spread retrogradely across single synaptic connections to presynaptic input neurons,  
59 but further spread is prevented by lack of gp4 <sup>15</sup>. A caveat to this approach is that OPCs that  
60 differentiate to oligodendrocytes <sup>16</sup> between tamoxifen administration and virus injection would  
61 still be susceptible to infection; likewise, infected OPCs that undergo differentiation could skew

62 histological assessment of input to starter cell ratios. To mitigate these concerns, we followed a  
63 narrow injection time course (Figure 1A) beginning in adult (6-month old) mice, when rates of  
64 OPC differentiation are substantially lower than in juveniles<sup>17</sup>.

65

66 3 days following a single dose of tamoxifen and 5 days following injection of SADΔG-  
67 EGFP(EnvA) into the genu of the corpus callosum inferior to the cingulum bundle, we observed  
68 substantial labeling of presynaptic neuronal inputs (Figure 1B). In control (gp4-TVA)<sup>fl</sup> mice  
69 lacking the *Pdgfra::CreER* transgene, injection of tamoxifen and modified rabies virus achieved  
70 only minor, local background labeling expected to result from small fractions of EnvA negative  
71 viral particles (Figure 1C). *Pdgfra*<sup>+</sup>/*Olig2*<sup>+</sup>/*EGFP*<sup>+</sup> starter cells were present in the injection site  
72 (Figure 1D), while other glial subtypes including *Gfap*<sup>+</sup> white matter astrocytes as well as *Iba1*<sup>+</sup>  
73 macrophages and microglia were EGFP negative, confirming the specificity of glial infection to  
74 the targeted OPC population (Figure S1A,B). Immunostaining for Cre expression at this  
75 timepoint confirmed previously-reported driver specificity to OPCs<sup>13</sup>, with no expression of Cre  
76 in *NeuN*<sup>+</sup> neurons in this context (Figure 1E). Thus, the starter cell population is limited to the  
77 oligodendroglial lineage, with no evidence of non-synaptic “leak” of virus into other cell  
78 populations. While viral infection did result in limited toxicity to infected OPCs as suggested by  
79 morphology, expression of the identifying markers, *Pdgfra* and *Olig2*, was retained (Figure  
80 S1C).

81

## 82 OPCs in corpus callosum receive brain-wide synaptic input

83 Quantification of input neurons revealed extensive neuronal territories that synapse onto starter  
84 OPCs in the corpus callosum (Figure 2A,B). Summing all inputs identified, viral input/starter  
85 ratios in this context are approximately 20 (slope of linear regression  $20.47 \pm 2.7$  standard error,  
86 Figure 2C), with neuronal input cells clearly identifiable by morphology and EGFP expression  
87 (Figure 2D). Neuronal inputs to OPCs in the genu of the corpus callosum inferior to the  
88 cingulum bundle are concentrated in dorsal and ventral mPFC (defined here to include anterior

89 cingulate, pre- and infralimbic regions) and secondary motor cortex (MOs) (Figure 2E). Inputs  
90 from primary motor (MOp) and primary somatosensory (SSp) cortices are also present, along  
91 with substantial connectivity from the thalamus (TH, Figure 2E). These previously unidentified  
92 thalamic inputs are most consistently localized to ventroanterolateral (VAL), anteromedial (AM),  
93 and anterodorsal (AD) nuclei, consistent with thalamocortical projection neurons targeting motor  
94 and prefrontal cortical areas (Figure 5). The majority of inputs identified arise ipsilateral to the  
95 viral injection site; however, the relatively high contribution of inputs arising in the contralateral  
96 mPFC combined with high overall labeling densities in this region suggest that callosal OPCs  
97 are substantially innervated by contralateral intracortical mPFC projections (Figure 2F). By  
98 contrast, thalamic inputs are ipsilaterally restricted, further supporting the monosynaptic  
99 restriction of viral labeling (Figure 2F).

100

101 While GABAergic inputs to OPCs have been described<sup>18,19</sup>, the majority of evidence for neuron-  
102 OPC synaptic connectivity in the corpus callosum arises from recordings of glutamatergic  
103 excitation either spontaneously or following callosal fiber stimulus<sup>1,2</sup>. Immunostaining for  
104 characteristic non-overlapping cortical inhibitory subpopulation markers accounting for the  
105 majority of total cortical inhibitory neurons<sup>20</sup> – parvalbumin (PV), vasoactive intestinal peptide  
106 (VIP), and somatostatin (SOM) – revealed PV+/GFP+ co-labeled inputs encompassing  
107 approximately 3% of inputs to OPCs in CC (Fig 2G). The majority of these PV+/GFP+ inputs  
108 were present ipsilaterally in the overlying MOs/mPFC. SOM or VIP co-labeled GFP+ input  
109 neurons comprised 1% or less of total inputs to OPCs in the CC. The excitatory to inhibitory  
110 neuron ratio of inputs to callosal OPCs is ~20:1, with inhibitory neurons defined by PV, VIP or  
111 SOM-expression.

112

113 OPCs in secondary motor cortex receive synaptic input from functionally associated cortical and  
114 thalamic neurons

115 Examining the afferents to cortical OPCs in the secondary motor (premotor, MOs, M2) cortex,  
116 injection of SADΔG-EGFP(EnvA) into MOs of *Pdgfra::CreER-(gp4-TVA)<sup>fl</sup>* mice (Figure 3B) again  
117 resulted in infection of *Pdgfra+*/EGFP+ starter OPCs. Labeled input neurons were strikingly  
118 predominant within functionally associated cortical territory defining the boundaries of MOs  
119 (Figure 3A,D). Input to starter cell ratios were not substantially different from those in CC-  
120 injected animals (slope of best-fit linear regression =  $18.76 \pm 4.4$  standard error, Figure 3C).  
121 Beyond MOs, a smaller fraction of inputs arise from primary motor cortex (MOp), nearby medial  
122 prefrontal cortex (mPFC), and to a lesser extent, projections from SSp, and thalamocortical  
123 projection neurons (Figure 3D,E), illustrating brain-wide and circuit-specific inputs to premotor  
124 cortical OPCs. Immunostaining for markers of interneuron identity revealed PV+/GFP+ inputs  
125 averaging 6% of total input neurons to mPFC OPCs, while SOM+/GFP+ or VIP+/GFP+  
126 costaining was present in approximately 1% or less of total inputs (Figure 3F). Input neurons to  
127 MOs OPCs are primarily ipsilateral, with a smaller proportion of afferent projections arising  
128 contralaterally than observed in OPCs within the CC (Figure 3G). Like CC OPCs, the excitatory  
129 to inhibitory ratio of inputs to premotor cortical OPCs is ~20:1, with inhibitory neurons defined by  
130 PV, VIP or SOM-expression.

131

132

133 OPCs in primary somatosensory cortex receive synaptic input from ipsilateral local and  
134 functionally-associated thalamic neurons

135 To assess whether the pattern of cortical OPC inputs arising from local cortical neurons and  
136 functionally-associated thalamic nuclei was specific to MOs, we injected SADΔG-EGFP(EnvA)  
137 into primary somatosensory cortex (SSp) of *Pdgfra::CreER-(gp4-TVA)<sup>fl</sup>* mice (Fig 4B). As in  
138 MOs and CC, this resulted in primary infection of *Pdgfra+*/EGFP+ starter OPCs, and as in MOs,  
139 inputs were confined primarily to functionally related cortical territory (SSp) (Fig 4A). Input to  
140 starter cell ratios at this site did not differ significantly from injections in CC or MOs (slope of  
141 best-fit linear regression =  $22.57 \pm 3.8$  standard error, Fig 4C). Examination of GFP+ input

142 neurons revealed inputs arising primarily from SSp across multiple cortical layers and thalamus  
143 (Fig 4D,E). In contrast to OPCs residing in CC, and to a lesser extent MOs, input neurons to  
144 OPCs in SSp are almost entirely ipsilaterally-restricted, and there is a small (<5%) contribution  
145 of input neurons from mPFC, MOs, or MOp. As in MOs, immunostaining for markers of  
146 interneuron identity revealed approximately 4% of GFP+ input neurons colabeled with PV, while  
147 SOM+ or VIP+ inputs comprised 1% or less of total GFP+ inputs (Fig 4F). Like CC and  
148 promotor cortex OPCs, the excitatory to inhibitory ratio of inputs to somatosensory cortical  
149 OPCs is ~20:1, with inhibitory neurons defined by PV, VIP or SOM-expression.

150

#### 151 Thalamic input neurons to OPCs arise from functionally-related thalamic nuclei

152 For OPCs in all brain regions studied, a substantial fraction of synaptic inputs arise from  
153 thalamic neurons. To assess whether these thalamic inputs arise from functionally-related  
154 nuclei, we registered acquired image tiles to the Allen Institute reference adult mouse brain atlas  
155 <sup>21</sup> and localized identified GFP+ inputs (Figure 5). Thalamic projections providing synaptic input  
156 to OPCs located in the corpus callosum underlying primary and secondary motor cortex arise  
157 primarily from ventral anterior-lateral (VAL) and anteromedial (AM) nuclei, consistent with known  
158 projections to motor planning territories (Fig 5A), along with projections from the anterodorsal  
159 (AD) nucleus. Strikingly, thalamic inputs to MOs OPCs also arose primarily from VAL and AM  
160 nuclei (Fig 5B). This is largely distinct from thalamic projections to SSp OPCs, which arise  
161 primarily within ventral posterolateral (VPL) and ventral posteromedial (VPM) regions,  
162 consistent with known projections to somatosensory targets (Fig 5C). Together, this suggests  
163 that particularly in the case of cortical OPCs, these previously unidentified thalamocortical  
164 synaptic inputs arise from functionally-related thalamic nuclei.

165

166 Total synaptic connectivity to OPCs is consistent across brain regions despite reduced input  
167 neuron activity

168 To assess whether the degree of synaptic connections to OPCs varied across the injection sites  
169 assessed, we compared the average neuronal input ratios, assessed as the slope of the best-fit  
170 linear regression to total GFP+ inputs versus starter *Pdgfra*+/*GFP*+ OPCs. We found no  
171 significant difference in the synaptic input ratios between OPCs in the CC, MOs, or SSp (Fig  
172 6A). To assess whether perturbations of synaptic input activity might modify the degree of  
173 synaptic connectivity, we performed daily whisker trimming of *Pdgfra*::*CreER*-(*gp4*-*TVA*)<sup>fl</sup> mice  
174 for 11 days prior to tamoxifen injection (Fig 6B). Anticipating that input activity to the cortical  
175 barrel field would be reduced in whisker-trimmed animals, we then injected SADΔG-  
176 EGFP(*EnvA*) into barrel field of trimmed and matched untrimmed control animals. 5 days after  
177 viral injection, the animals were euthanized and total GFP+ input neurons and *Pdgfra*+/*GFP*+  
178 starter OPCs were quantified. We found no significant difference in neuronal to starter input  
179 ratio between whisker-trimmed and untrimmed control animals as assessed by the slope of  
180 best-fit linear regression (Fig 6C,D). Moreover, we found no significant difference in the  
181 distribution of input neurons between trimmed and untrimmed animals, with primarily  
182 somatosensory cortical inputs and approximately 10% of inputs arising from thalamus (Fig 6E).  
183 Quantification of immunostaining for interneuron markers revealed PV+GFP+ inputs in equal  
184 proportion (3-4%) in trimmed and untrimmed groups (Fig 6F), indicating an unchanged  
185 excitatory to inhibitory (PV+ neuron) ratio of OPC inputs regardless of whisker trimming at this  
186 time point. Taken together, neither OPC location across white and gray matter territories, nor  
187 modification of input activity in barrel field by whisker trimming modified the quantity or pattern of  
188 neurons providing synaptic input to OPCs.

189

## 190 **DISCUSSION**

191 Substantial progress in characterizing the electrophysiological properties of neuron-OPC  
192 synapses has yet to clarify their potential role in modulating oligodendrocyte lineage dynamics  
193 and ultimately animal behavior. In particular, prior to this work little was known regarding the  
194 extent of neuronal input territories to OPCs beyond local neurons and fiber bundles accessible

195 in a slice preparation. Using a monosynaptically restricted trans-synaptic retrograde tracing  
196 system, we have now elucidated a map of neuronal input territories to OPCs in three distinct  
197 regions of the mouse brain. OPCs in these territories – selected due to previously reported  
198 changes in local oligodendrocyte lineage dynamics in response to neuronal activity – all receive  
199 brain-wide, circuit-specific synaptic input. Strikingly, the ratio of input neurons to starter OPCs is  
200 consistent across MOs, SSp, and CC, despite the much greater local axon density in CC and  
201 despite higher OPC turnover rates in CC than either cortical territory. This suggests that  
202 regulation of the number of neuron-OPC synapses may be intrinsic to the OPC rather than  
203 specified by local neurons or other microenvironmental factors in these brain regions.

204

205 While the estimated number of synaptic inputs appears consistent across mapped regions, the  
206 localization of these strikingly extensive inputs is distinct by location and support a pattern of  
207 functionally-associated brain-wide afferent connectivity to OPCs. For OPCs present in the CC  
208 genu inferior to the cingulum bundle, there is a relative bias of inputs from cortical regions  
209 involved in planning and execution of motor skills, and ~ 25% of these inputs arise contralateral  
210 to the targeted OPCs. While previous studies have demonstrated evoked synaptic inputs to  
211 these white matter OPCs by stimulation of callosal fibers, we now provide an unbiased  
212 assessment of the cortical projection neurons and interneurons responsible for these synapses,  
213 as well as previously unrecognized OPC inputs from thalamocortical projections. Notably,  
214 behavioral paradigms shown to alter oligodendrocyte lineage dynamics in mice, including motor  
215 learning tasks and social isolation, are thought to drive dynamic changes in neuronal activity in  
216 MOs and mPFC. We now demonstrate that the majority of synaptic inputs to these white matter  
217 OPCs arise from these very brain regions. These synaptic inputs are also largely excitatory, with  
218 immunostaining revealing a relatively small fraction of OPC inputs arising from local PV+  
219 interneurons. Strikingly, this fraction is relatively consistent across cortical and white matter  
220 territories investigated here, which may result either from higher regional density of excitatory



221 projection axons or may indicate that OPCs actively regulate the number of interneuron inputs  
222 as a mechanism to maintain excitatory:inhibitory balance.

223

224 Our assessment of synaptic inputs to gray matter OPCs maps neuronal connectivity to this  
225 regionally and perhaps functionally distinct cell population. In contrast to callosal white matter  
226 OPCs, neuronal inputs to OPCs present in SSp or MOs primarily arise within ipsilateral local  
227 cortex, although a smaller fraction (mean approximately 7.5%) of inputs to OPCs in MOs arise  
228 contralaterally. Additionally, we identify functionally-associated thalamocortical projections  
229 providing previously unrecognized synaptic input to these OPCs. Taken together, the  
230 demonstrated map of input neurons to cortical OPCs suggests a mechanism by which OPCs  
231 could sense synchronized patterns of activity between thalamus and cortex. In turn, integration  
232 of this synaptic activity by individual OPCs might coordinate or regulate adaptive myelination of  
233 circuitry linking cortical and thalamic territories – a model that merits evaluation in future studies.

234

235 While the localization and laterality of neuronal input to OPCs varies depending on brain region,  
236 the total numerical extent of input connections – as measured by input:starter ratio – is  
237 remarkably consistent across territories. Given that the rate of OPC turnover in these regions  
238 has been shown to vary <sup>22</sup>, it follows that the extent of synaptic input must be regulated by a  
239 newly-generated OPC to result in equivalent connectivity. OPCs in input-deprived  
240 somatosensory cortex following unilateral whisker trimming are less likely to survive in a critical  
241 temporal window following division, which subsequently results in diminished generation of  
242 mature oligodendrocytes <sup>23</sup>. Moreover, genetic ablation of AMPA receptors in OPCs reduces the  
243 survival of oligodendrocytes generated during development <sup>24</sup>. We now demonstrate that  
244 deprivation of input activity to barrel field OPCs by whisker trimming does not alter the synaptic  
245 input ratios of surviving cells, nor does it impact the distribution of neuronal inputs at the time  
246 point evaluated. This may suggest that the pool of OPCs giving rise to early oligodendrocytes in  
247 the above studies begin from the same level of synaptic connectivity. From this baseline, activity

248 deprivation-related deficits resulting in decreased survival may accumulate at later stages of cell  
249 differentiation. Alternatively, OPCs that fail to attain sufficient synaptic input in the critical  
250 window after division may fail to survive, resulting in deficient oligodendrogenesis despite  
251 apparently normal starter to input ratios. An important caveat to highlight is that, using this  
252 method we cannot delineate the connectivity of single cells, only the population total. This raises  
253 the possibility that a mixture of high and low-connectivity OPCs could exist, and newly-  
254 generated cells could tend to sort into one pool or the other under the control of local factors,  
255 however this possibility cannot be tested with existing methods and will remain a question for  
256 future work. This discovery of widespread, functionally-associated, and remarkably stable  
257 neuronal afferents to OPCs thus indicates a need to probe context-specific roles of neuron-OPC  
258 synaptic connectivity and ultimately to determine the function of these enigmatic structures.

259  
260

#### 261 **Acknowledgements**

262 We thank Brady Weissbourd for helpful discussion and Pamelyn Woo for assistance with animal  
263 colony maintenance. The authors gratefully acknowledge support from the California Institute for  
264 Regenerative Medicine (CIRM RN3-06510), National Institute of Neurological Disorders and  
265 Stroke (NINDS R01NS092597 and F31NS098554), NIH Director's Pioneer Award  
266 (DPINS111132), SFARI Foundation, Maternal and Child Health Research Institute at Stanford  
267

268  
269

#### 269 **References**

- 270 1 Ziskin, J., Nishiyama, A., Rubio, M., Fukaya, M. & Bergles, D. Vesicular release of  
271 glutamate from unmyelinated axons in white matter. *Nat Neurosci* **10**, 321-330,  
272 doi:10.1038/nn1854 (2007).
- 273 2 De Biase, L., Nishiyama, A. & Bergles, D. Excitability and synaptic communication  
274 within the oligodendrocyte lineage. *J Neurosci* **30**, 3600-3611,  
275 doi:10.1523/JNEUROSCI.6000-09.2010 (2010).
- 276 3 Kukley, M., Capetillo-Zarate, E. & Dietrich, D. Vesicular glutamate release from axons  
277 in white matter. *Nat Neurosci* **10**, 311-320, doi:10.1038/nn1850 (2007).
- 278 4 Lundgaard, I. *et al.* Neuregulin and BDNF induce a switch to NMDA receptor-  
279 dependent myelination by oligodendrocytes. *PLoS Biol* **11**, e1001743,  
280 doi:10.1371/journal.pbio.1001743 (2013).
- 281 5 Gibson, E. M. *et al.* Neuronal activity promotes oligodendrogenesis and adaptive  
282 myelination in the mammalian brain. *Science* **344**, 1252304,  
283 doi:10.1126/science.1252304 (2014).
- 284 6 Mitew, S. *et al.* Pharmacogenetic stimulation of neuronal activity increases  
285 myelination in an axon-specific manner. *Nat Commun* **9**, 306, doi:10.1038/s41467-  
286 017-02719-2 (2018).

- 287 7 Hughes, E. G., Orthmann-Murphy, J. L., Langseth, A. J. & Bergles, D. E. Myelin  
288 remodeling through experience-dependent oligodendrogenesis in the adult  
289 somatosensory cortex. *Nat Neurosci* **21**, 696-706, doi:10.1038/s41593-018-0121-5  
290 (2018).
- 291 8 Mensch, S. *et al.* Synaptic vesicle release regulates myelin sheath number of  
292 individual oligodendrocytes in vivo. *Nat Neurosci* **18**, 628-630, doi:10.1038/nn.3991  
293 (2015).
- 294 9 Hines, J. H., Ravanelli, A. M., Schwindt, R., Scott, E. K. & Appel, B. Neuronal activity  
295 biases axon selection for myelination in vivo. *Nat Neurosci* **18**, 683-689,  
296 doi:10.1038/nn.3992 (2015).
- 297 10 McKenzie, I. A. *et al.* Motor skill learning requires active central myelination. *Science*  
298 **346**, 318-322, doi:10.1126/science.1254960 (2014).
- 299 11 Xiao, L. *et al.* Rapid production of new oligodendrocytes is required in the earliest  
300 stages of motor-skill learning. *Nat Neurosci* **19**, 1210-1217, doi:10.1038/nn.4351  
301 (2016).
- 302 12 Geraghty, A. C. *et al.* Loss of Adaptive Myelination Contributes to Methotrexate  
303 Chemotherapy-Related Cognitive Impairment. *Neuron*,  
304 doi:10.1016/j.neuron.2019.04.032 (2019).
- 305 13 Kang, S., Fukaya, M., Yang, J., Rothstein, J. & Bergles, D. NG2+ CNS glial progenitors  
306 remain committed to the oligodendrocyte lineage in postnatal life and following  
307 neurodegeneration. *Neuron* **68**, 668-681, doi:10.1016/j.neuron.2010.09.009 (2010).
- 308 14 Takato, J. *et al.* New modules are added to vibrissal premotor circuitry with the  
309 emergence of exploratory whisking. *Neuron* **77**, 346-360,  
310 doi:10.1016/j.neuron.2012.11.010 (2013).
- 311 15 Wickersham, I. R. *et al.* Monosynaptic restriction of transsynaptic tracing from  
312 single, genetically targeted neurons. *Neuron* **53**, 639-647,  
313 doi:10.1016/j.neuron.2007.01.033 (2007).
- 314 16 Ye, F. *et al.* HDAC1 and HDAC2 regulate oligodendrocyte differentiation by  
315 disrupting the beta-catenin-TCF interaction. *Nat Neurosci* **12**, 829-838,  
316 doi:10.1038/nn.2333 (2009).
- 317 17 Young, K. *et al.* Oligodendrocyte dynamics in the healthy adult CNS: evidence for  
318 myelin remodeling. *Neuron* **77**, 873-885, doi:10.1016/j.neuron.2013.01.006 (2013).
- 319 18 Kukley, M. *et al.* Glial cells are born with synapses. *FASEB J* **22**, 2957-2969,  
320 doi:10.1096/fj.07-090985 (2008).
- 321 19 Lin, S. C. & Bergles, D. E. Synaptic signaling between GABAergic interneurons and  
322 oligodendrocyte precursor cells in the hippocampus. *Nat Neurosci* **7**, 24-32,  
323 doi:10.1038/nn1162 (2004).
- 324 20 Pfeffer, C. K., Xue, M., He, M., Huang, Z. J. & Scanziani, M. Inhibition of inhibition in  
325 visual cortex: the logic of connections between molecularly distinct interneurons.  
326 *Nat Neurosci* **16**, 1068-1076, doi:10.1038/nn.3446 (2013).
- 327 21 Lein, E. S. *et al.* Genome-wide atlas of gene expression in the adult mouse brain.  
328 *Nature* **445**, 168-176, doi:10.1038/nature05453 (2007).
- 329 22 Rivers, L. *et al.* PDGFRA/NG2 glia generate myelinating oligodendrocytes and  
330 piriform projection neurons in adult mice. *Nat Neurosci* **11**, 1392-1401,  
331 doi:10.1038/nn.2220 (2008).
- 332 23 Hill, R., Patel, K., Goncalves, C., Grutzendler, J. & Nishiyama, A. Modulation of  
333 oligodendrocyte generation during a critical temporal window after NG2 cell  
334 division. *Nat Neurosci* **17**, 1518-1527, doi:10.1038/nn.3815 (2014).

335 24 Kougioumtzidou, E. *et al.* Signalling through AMPA receptors on oligodendrocyte  
336 precursors promotes myelination by enhancing oligodendrocyte survival. *Elife* 6,  
337 doi:10.7554/eLife.28080 (2017).  
338  
339

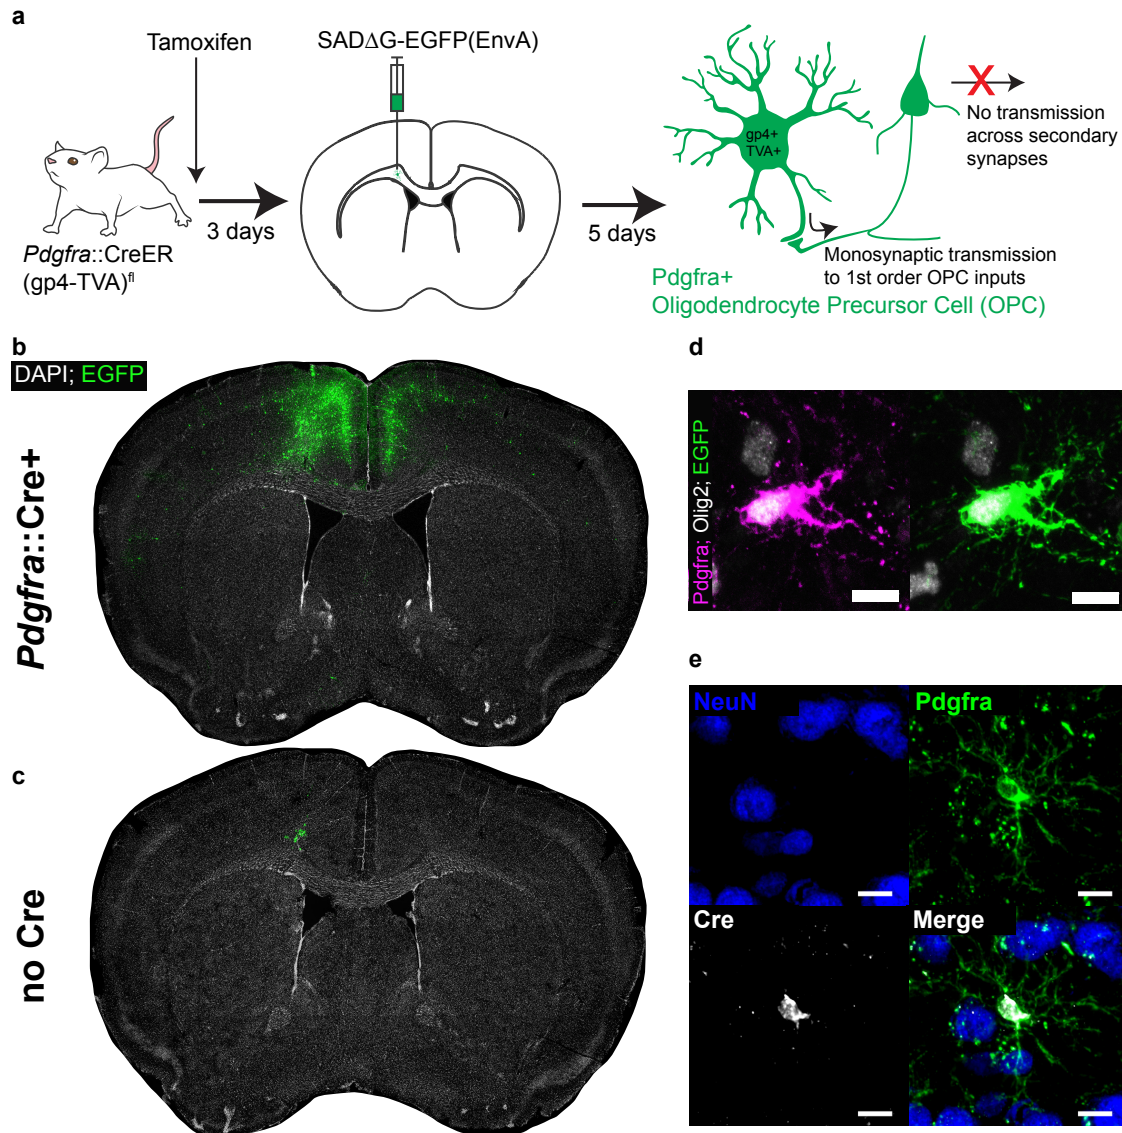

340  
341  
342  
343  
344  
345  
346  
347  
348  
349  
350  
351  
352  
353

**Figure 1. Monosynaptically-restricted rabies virus enables tracing of synaptic inputs to OPCs.** (a) Outline of experimental strategy used to label inputs to *Pdgfra*<sup>+</sup> OPCs. (b) Injection of SADΔG-EGFP(EnvA) into sub-cingulate corpus callosum results in widespread labeling of EGFP<sup>+</sup> input neurons (representative injection site image from *n*=10 animals. Green = EGFP, white = DAPI). (c) Injection of SADΔG-EGFP(EnvA) into animals lacking *Pdgfra::CreER* driver allele results in only minimal transduction, likely resulting from minimal quantities of EnvA- viral particles (representative image of *n*=4 animals. Green = EGFP, white = DAPI). (d) *Pdgfra*<sup>+</sup>/Olig2<sup>+</sup> OPC starter cells (left) are transduced with SADΔG-EGFP(EnvA) (right, same cell. Magenta = *Pdgfra*, white = Olig2, green = EGFP). (e) Immunostaining confirms Cre recombinase expression in *Pdgfra*<sup>+</sup> OPCs (green) but not NeuN<sup>+</sup> neurons (blue). Scale bars in (d,e) represent 10 microns.

354  
355

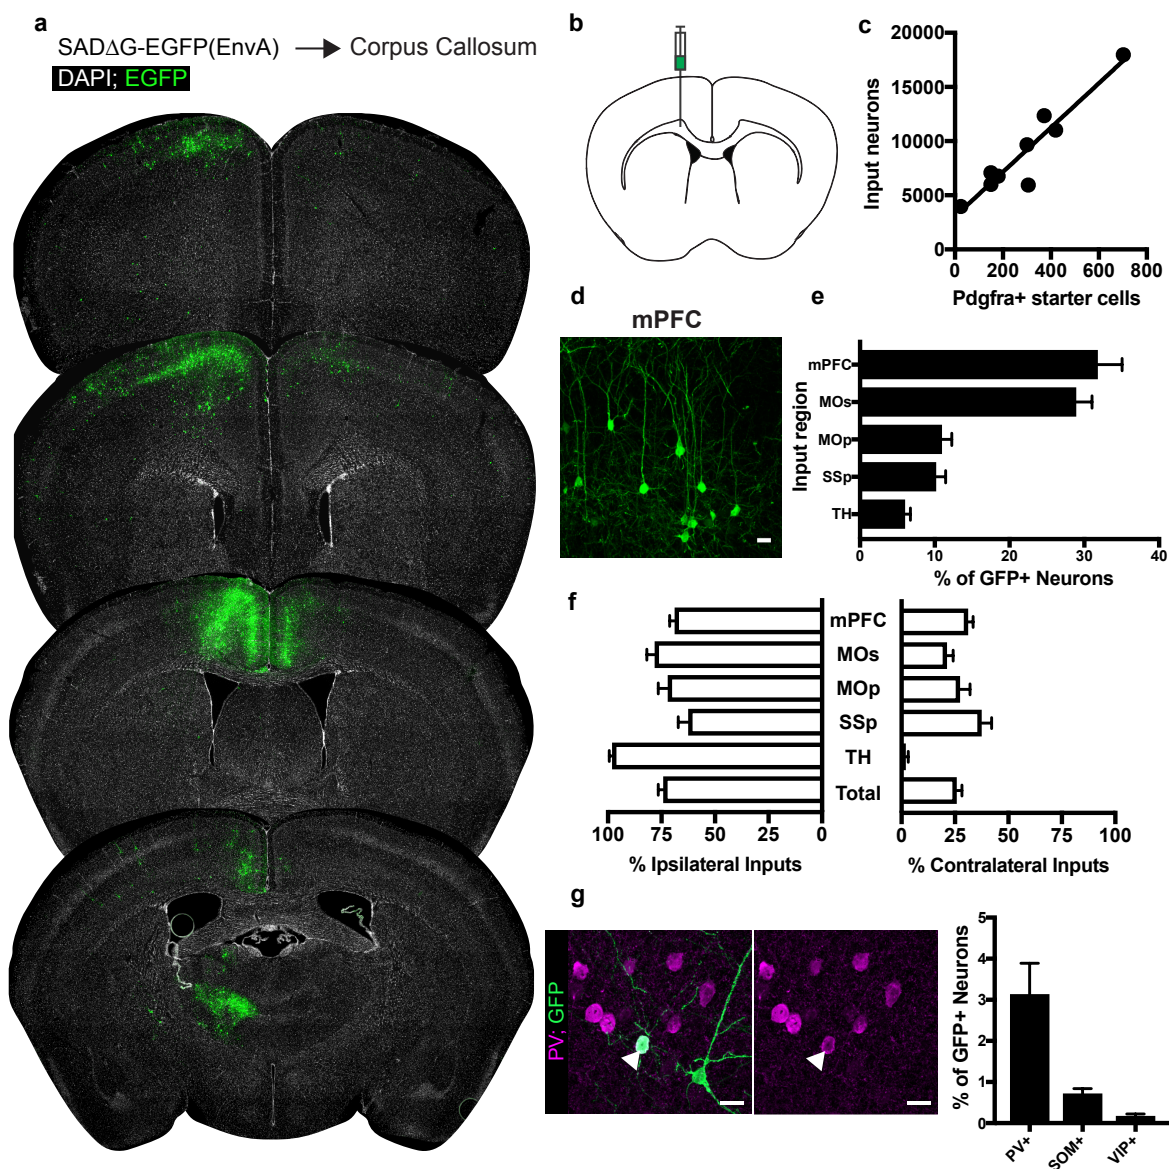

356  
357  
358  
359  
360  
361  
362  
363  
364  
365  
366  
367  
368  
369  
370  
371  
372

**Figure 2. Neuronal inputs to callosal OPCs arise from functionally interconnected cortical and thalamic areas.** (a) Representative sections of neuronal input labeling to OPCs following stereotaxic injection of SADΔG-EGFP(EnvA) to corpus callosum underlying the secondary motor area. Green = EGFP, white = DAPI. (b) Schematic of injection site. (c) Linear regression fit of neuronal input/Pdgfra+ OPC starter cells. Each point represents one animal,  $R^2 = 0.8909$ , slope =  $20.47 \pm 2.7$  standard error. (d) Representative confocal micrograph of EGFP+ (green) input neurons in medial prefrontal (mPFC) cortex. (e) Inputs to callosal OPCs largely arise from frontal association cortices but also include primary motor and somatosensory areas and thalamic nuclei. Each bar represents mean input percentage, error bars indicate SEM, n=10 total. mPFC = medial prefrontal cortex (anterior cingulate, prelimbic, infralimbic regions), MOs = secondary motor area, MOp = primary motor area, SSp = primary somatosensory area, TH = thalamus (including all thalamic nuclei). (f) Percent of input neurons ipsilateral or contralateral to the OPC starter cells. Bars indicate mean, error bars indicate SEM, n=10 animals. (g) Representative image of parvalbumin+ (PV+, magenta) GFP+ (green) input neuron and quantification of percentage of input neurons that co-label with immunofluorescence makers for

373 PV, somatostatin (SOM), or vasoactive intestinal peptide (VIP). Bars represent mean, error bars  
 374 indicate SEM, n=6 total. Scale bars in (d,g) represent 20 microns.  
 375

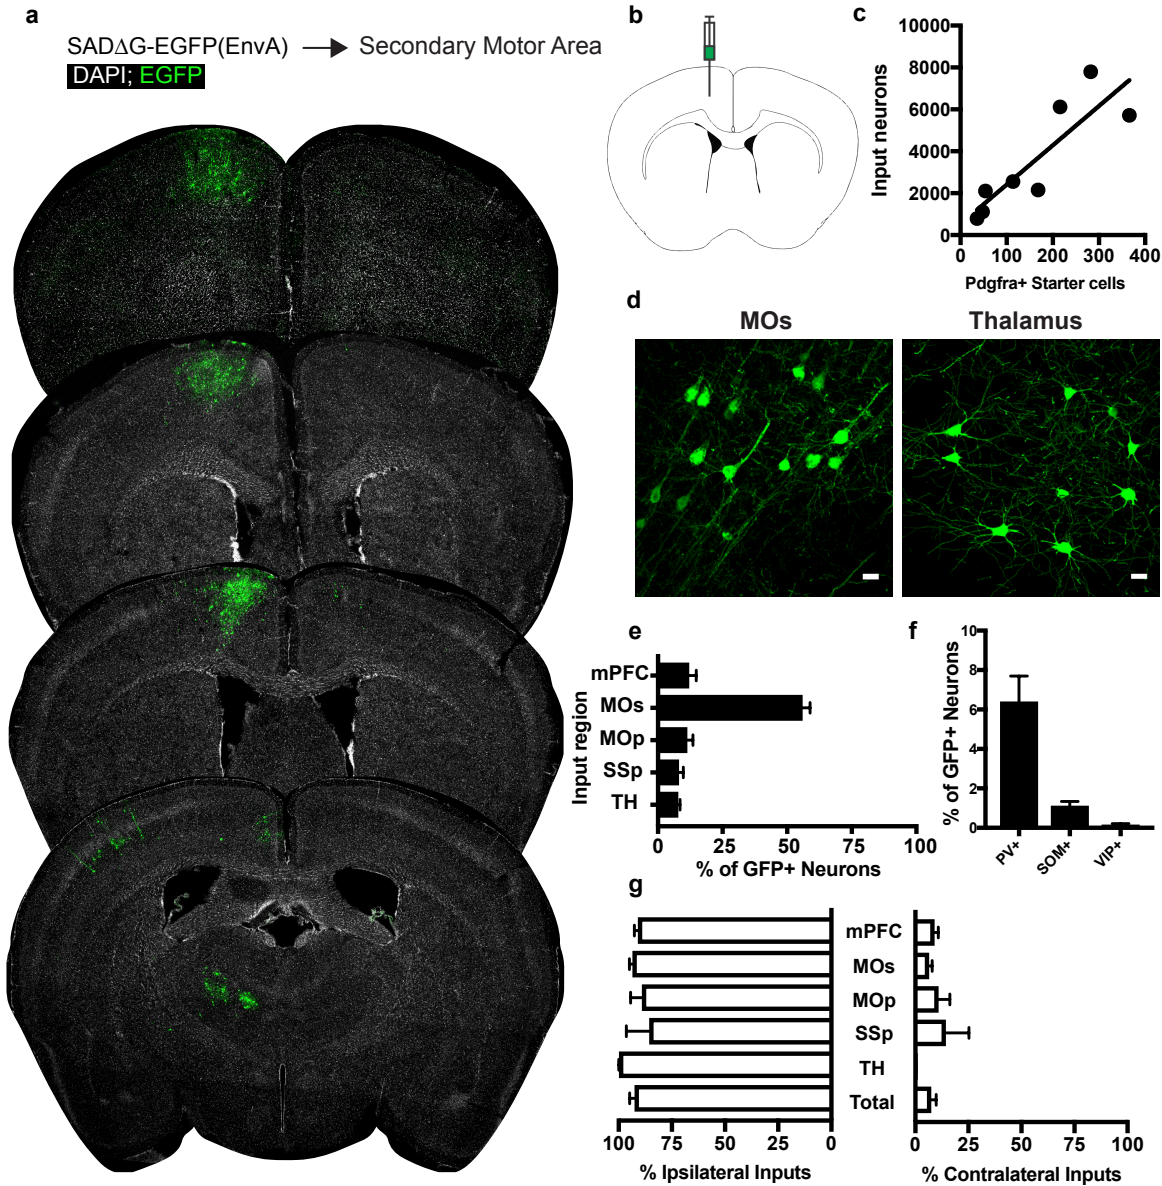

376  
 377  
 378 **Figure 3. Circuit-specific cortical and thalamic neuronal inputs to OPCs in secondary**  
 379 **motor area (MOs)** (a) Representative sections of neuronal input labeling to OPCs following  
 380 stereotaxic injection of SADΔG-EGFP(EnvA) to MOs. Green = EGFP, white = DAPI. (b)  
 381 Schematic of injection site. (c) Linear regression fit of neuronal input/Pdgfra+ starter cells. Each  
 382 point represents one animal,  $R^2 = 0.7486$ , slope =  $18.76 \pm 4.4$  standard error). (d)  
 383 Representative confocal micrographs of EGFP+ (green) input neurons in secondary motor  
 384 cortex (MOs) and thalamus. (e) Inputs to grey matter OPCs found in MOs are chiefly located  
 385 within MOs, n = 8 animals total. mPFC = medial prefrontal cortex (anterior cingulate, prelimbic,  
 386 infralimbic regions), MOs = secondary motor area, MOp = primary motor area, SSp = primary  
 387 somatosensory area, TH = thalamus (including all thalamic nuclei). (f) Percentage of input  
 388 neurons that co-label with immunofluorescence makers for parvalbumin (PV), somatostatin  
 389 (SOM), or vasoactive intestinal peptide (VIP), n=5. (g) Percent of input neurons ipsilateral or

390 contralateral to OPC starter cells. Bars indicate mean, error bars indicate SEM, each point  
391 represents an individual animal (n=8). Scale bars in (d) represent 20 microns.  
392

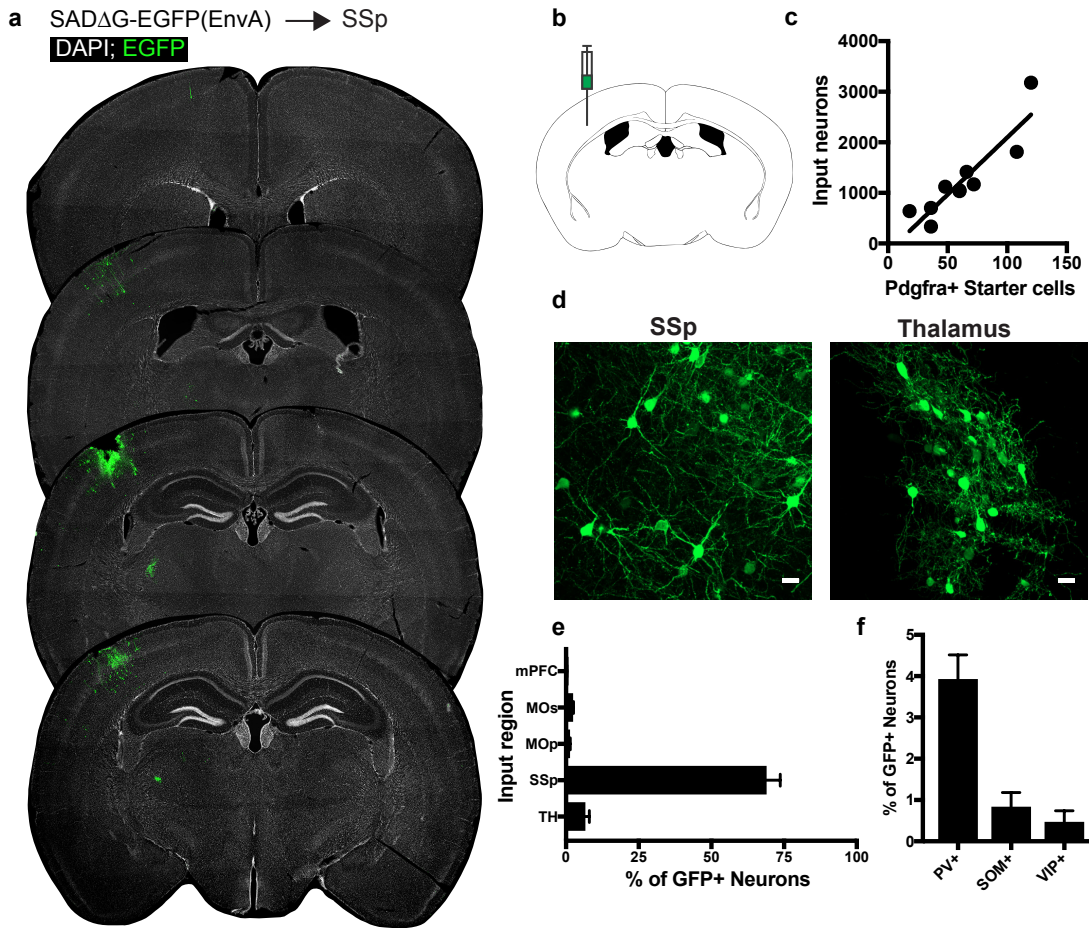

393  
394  
395 **Figure 4. Circuit-specific cortical and thalamic neuronal neuronal inputs to SSp** (a)  
396 Representative sections of neuronal input labeling to OPCs following stereotaxic injection of  
397 SAD $\Delta$ G-EGFP(EnvA) to SSp. Green = EGFP, white = DAPI. (b) Schematic of injection site. (c)  
398 Linear regression fit of neuronal input/Pdgfra+ starter cells. Each point represents one animal,  
399  $R^2 = 0.8145$ , slope =  $22.57 \pm 3.8$  standard error). (d) Representative confocal micrographs of  
400 EGFP+ (green) input neurons in primary somatosensory cortex (SSp) and thalamus. (e) Inputs  
401 to grey matter OPCs found in SSp are chiefly located within SSp. n = 9 animals total. mPFC =  
402 medial prefrontal cortex (anterior cingulate, prelimbic, infralimbic regions), MOs = secondary  
403 motor area, MOp = primary motor area, SSp = primary somatosensory area, TH = thalamus  
404 (including all thalamic nuclei). (f) Percentage of input neurons that co-label with  
405 immunofluorescence makers for parvalbumin (PV), somatostatin (SOM), or vasoactive intestinal  
406 peptide (VIP), n = 5 animals. Bars indicate mean, error bars indicate SEM. Scale bars in (d)  
407 represent 20 microns.  
408

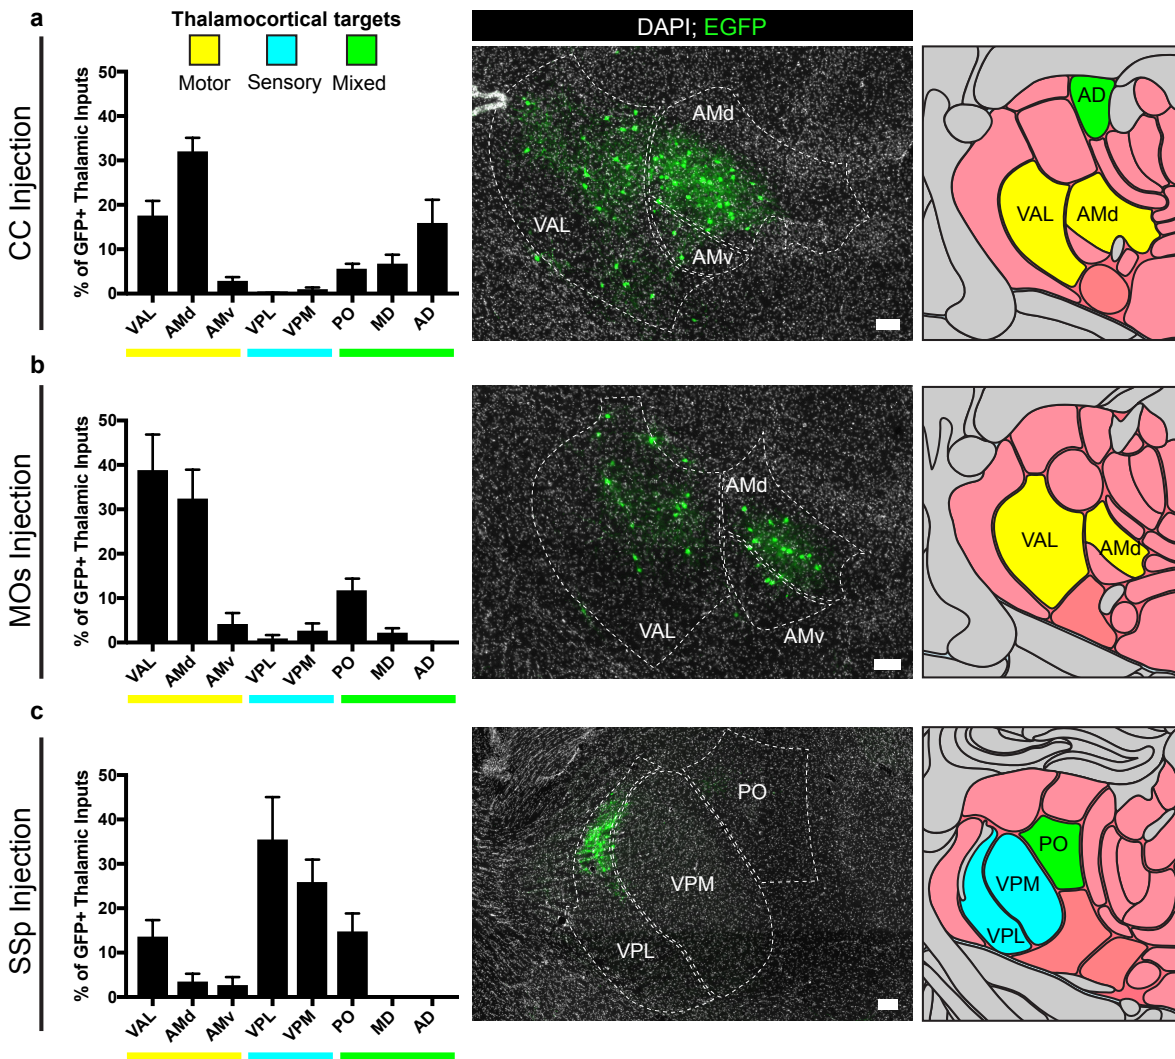

409  
410  
411  
412  
413  
414  
415  
416  
417  
418  
419  
420  
421  
422  
423  
424  
425

**Figure 5. Thalamic inputs to OPCs arise from functionally-related nuclei.** Tiled immunofluorescence images of GFP+ input neurons were registered to the Allen Brain Atlas to determine the thalamic nuclei from which the inputs arise. Nuclei are color-coded here according to the primary function of their cortical projection targets – motor (yellow), sensory (blue), or mixed (green). (a) Thalamic inputs to OPCs in the CC underlying primary and secondary motor cortices arise primarily from ventral anterior-lateral (VAL) and anteriomedial (AM) nuclei. (b) Thalamic inputs to OPCs in MOs arise primarily from VAL and AM nuclei. (c) Thalamic inputs to SSp arise primarily from ventral posterolateral (VPL) and ventral posteromedial (VPM) nuclei. All bars indicate mean, error bars indicate SEM. Scale bars represent 100 microns. N = 10 mice (CC), 8 mice (MOs), and 6 mice (SSp) respectively. Thalamic nuclei defined as presented in the Allen Brain Atlas and abbreviated as follows: VAL = ventral anterior-lateral, AMd = anteromedial dorsal part, AMv = anteromedial ventral part, VPL = ventral posterolateral, VPM = ventral posteromedial, PO = posterior complex, MD = mediodorsal, AD = anterodorsal.



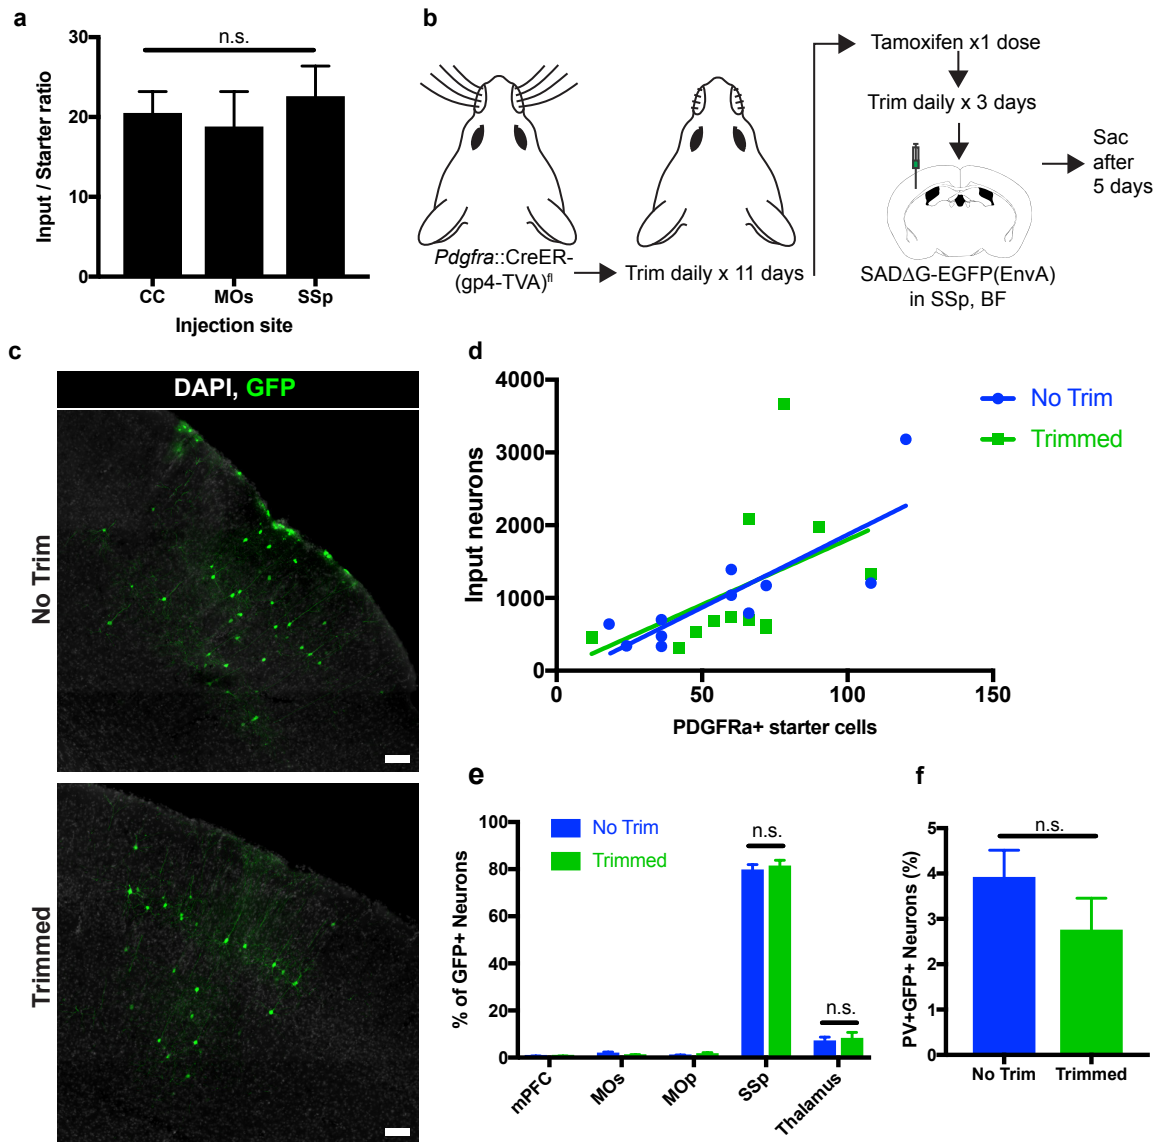

426  
427  
428  
429  
430  
431  
432  
433  
434  
435  
436  
437  
438  
439  
440  
441  
442  
443

**Figure 6. Neuronal input to OPC starter ratios are consistent across brain region and despite whisker trimming-induced activity deprivation.** (a) Neuronal input to OPC starter ratios, as measured by the slope of the best-fit linear regression of GFP+ input neurons against *Pdgfra*+ /GFP+ OPC starter cells. Bars indicate mean, error bars indicate standard error of linear regression. (b) Outline of whisker trimming deprivation experiment and subsequent viral injection into barrel field of somatosensory cortex (SSp, BF). (c) Representative images of GFP+ input neurons in SSp, BF of non-trimmed and trimmed animals, white = DAPI, green = GFP. (d) Scatter plot of GFP+ input neurons against *Pdgfra*+ /GFP+ starter OPCs and best-fit linear regression to assess average input to starter cell ratio in whisker-trimmed (Trimmed) and control (No Trim) groups. Each point represents an independent animal, n = 13 (Trimmed), n = 11 (No Trim). (e) Distribution of GFP+ neuronal inputs to OPCs in Trimmed and No Trim groups as a percentage of total inputs. n = 13 (Trimmed), n = 11 (No Trim). (f) Proportion of total GFP+ input neurons immunostaining for parvalbumin (PV) in Trimmed and No Trim groups, n=5 each. Bars indicate mean, error bars indicate SEM. Scale bars in (c) represent 100 microns. Statistical testing performed by Tukey's multiple comparisons test, n.s. indicates p>0.05.

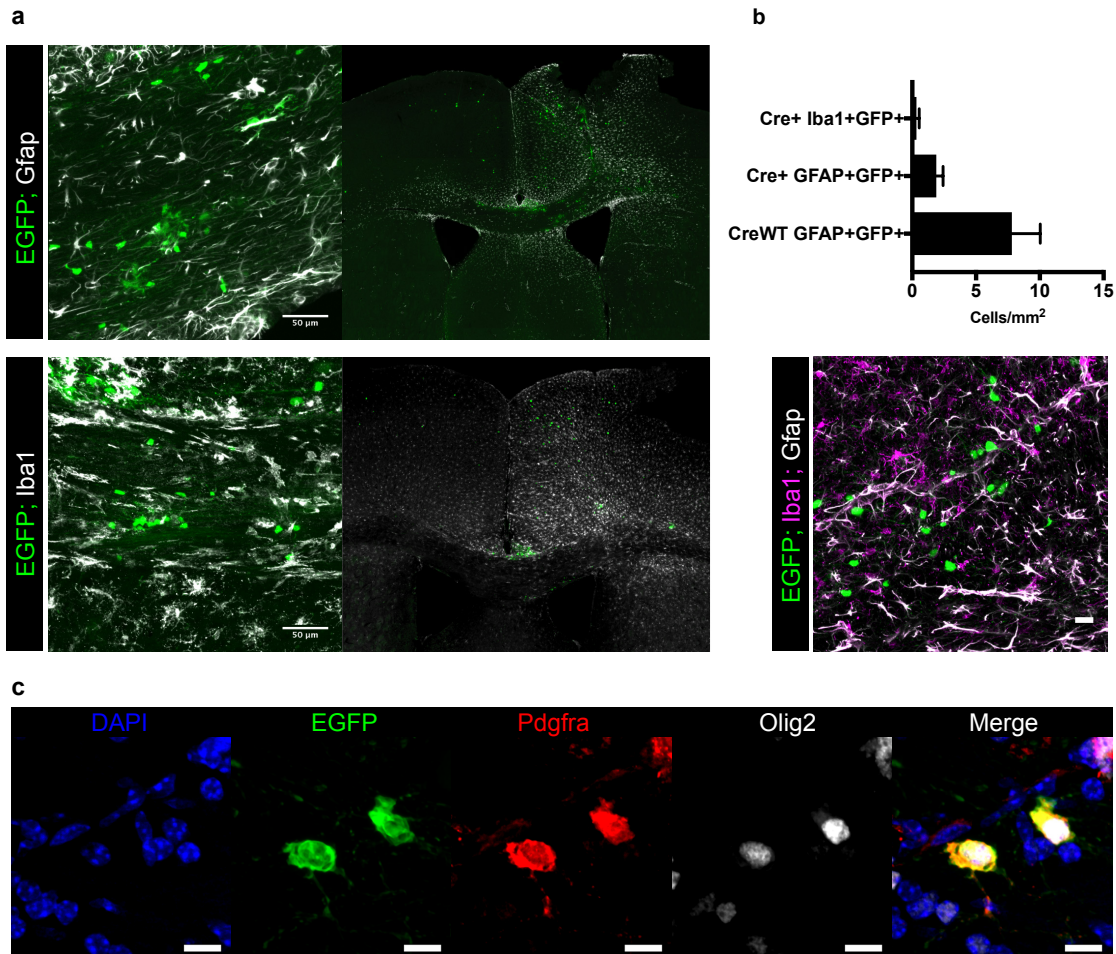

444  
445  
446  
447  
448  
449  
450  
451  
452  
453  
454  
455  
456  
457  
458  
459

**Figure S1. Related to Figure 1. SADΔG-EGFP(EnvA) does not substantially infect other glial subtypes.** (a) Immunofluorescence staining for the white matter and reactive astrocyte marker Gfap (white; top panels) and the macrophage marker Iba1 (white; bottom panels) does not identify substantial evidence of EGFP+ (green) astroglial/microglial cells despite evidence of reactive gliosis in the injection site. (b) Quantification of colocalization studies represented in (a) demonstrates minimal overlap concentrated to the injection site that is not increased in Cre+ animals compared with minimal expected background labeling in Cre WT controls. In the representative merged image from a quantified region, green = EGFP; magenta = Iba1; white = Gfap. (c) Example of EGFP+Pdgfra+Olig2+ starter cells with disrupted morphology. Blue = DAPI, green = EGFP; red = Pdgfra; white = Olig2. Bars indicate the mean, n=6 animals (Cre WT) or 9 animals (Cre+) respectively; error bars represent SEM. Scale bars in (a) are 50 microns, in (b) are 20 microns, and in (c) are 10 microns.

## Methods

### Animal breeding

463 All animal studies were approved by the Stanford Administrative Panel on Laboratory Animal  
464 Care (APLAC). Animals were housed on a 12hr light cycle according to institutional guidelines.  
465 Mice expressing CreER under the control of *Pdgfra* promoter/enhancer regions  
466 (*Pdgfra*::Cre/ERT) were purchased from The Jackson Laboratory (stock number 018280) and  
467 have been previously described<sup>13</sup>. Mice expressing a recombinant rabies G glycoprotein gene  
468 (*RABVgp4*) along with the gene encoding avian leucosis and sarcoma virus subgroup A

469 receptor (*TVA*) preceded by a *loxP*-flanked STOP fragment and inserted into the  
470 *GT(ROSA)26Sor* locus (*R26(gp4-TVA)<sup>fl/fl</sup>*) have been previously described<sup>14</sup> and were  
471 purchased from The Jackson Laboratory (stock number 024708). Hemizygous *Pdgfra::Cre/ERT*  
472 mice were then crossed with homozygous *R26(gp4-TVA)<sup>fl/fl</sup>* mice to generate animals used in  
473 subsequent experiments. Genotyping was performed by PCR according to supplier protocols.

#### 474 475 Viral tracing

476 EGFP-expressing G-deleted rabies virus pseudotyped with EnvA (*SADΔG-EGFP(EnvA)*)<sup>15</sup> was  
477 prepared at and obtained from the Salk Institute Gene Transfer, Targeting, and Therapeutics  
478 Facility vector core (GT3). Virus used in these studies originated in two lots with reported titers  
479 of  $7.92 \times 10^7$  and  $1.94 \times 10^9$  TU/mL. 3 days prior to stereotaxic injections, Cre/ERT-mediated  
480 recombination was induced by a single IP injection of 100mg/kg of tamoxifen (Sigma)  
481 solubilized in corn oil. Stereotaxic delivery of virus occurred under isoflurane anesthesia in  
482 BSL2+ conditions. 300nL of *SADΔG-EGFP(EnvA)* was delivered to the corpus callosum  
483 (coordinates AP +1mm, ML - 1mm, DV -1.2mm) or the overlying secondary motor area  
484 (coordinates AP + 1mm, ML - 0.8mm, DV -0.5mm) or primary somatosensory cortex  
485 (coordinates AP -1mm, ML -3mm, DV -0.7mm) over 5 minutes (Stoelting stereotaxic injector).  
486 Animals were monitored for general health, and no adverse symptoms of viral administration  
487 were observed. 5 days following viral injection, animals were deeply anesthetized with  
488 tribromoethanol and transcardially perfused with PBS followed by 4% PFA, then brains were  
489 removed and post-fixed overnight in 4% PFA. Brains were then transferred to 30% sucrose, and  
490 after sinking serial 40 micrometer floating coronal sections were prepared on a freezing-stage  
491 microtome for subsequent immunolabeling and imaging.

#### 492 493 Whisker trimming

494 *Pdgfra::CreERT; R26(gp4-TVA)<sup>fl</sup>* mice generated as described above were trimmed of whiskers  
495 bilaterally to the level of the skin using electric clippers daily beginning at P25. At P37,  
496 tamoxifen was injected as described above, and whisker trimming continued daily until P40,  
497 when *SADΔG-EGFP(EnvA)* was injected as described above. Animals were then sac'd and  
498 perfused at P45 as described above.

#### 499 500 Immunofluorescence and confocal microscopy

501 Antibodies and dilutions used for immunofluorescence staining were as follows: polyclonal goat  
502 anti-mouse *Pdgfra* (R&D Systems, AF1062, 1:500), monoclonal rabbit anti-mouse *Olig2* (Abcam  
503 EPR2673, 1:500), polyclonal chicken anti-GFP (Abcam, ab13970, 1:1000), polyclonal rabbit  
504 anti-parvalbumin (Abcam, ab11427, 1:250), monoclonal rat anti-somatostatin (Millipore,  
505 MAB354, 1:200), polyclonal rabbit anti-VIP (Immunostar 20077, 1:500), polyclonal rabbit anti-  
506 *Iba1* (Wako, 1:500), and mouse anti-Cre recombinase (Millipore, MAB3120, clone 2D8, 1:1000).  
507 Tissues collected at serial intervals of 1 in every 6 sections were blocked and permeabilized  
508 with 3% normal donkey serum and 0.3% Triton X-100 in Tris-Buffered Saline (3%NDS/TBST)  
509 for 30 minutes at room temperature, followed by incubation with antibodies at the indicated  
510 dilution factors in 1%NDS/TBST for 18 hours at 4 degrees C. For mouse anti-Cre recombinase  
511 staining, NDS block was followed by treatment with mouse-on-mouse staining reagent (Vector  
512 Laboratories, BMK-2202) prior to incubation with primary antibody. Following a series of  
513 washes, secondary AlexaFluor-tagged antibodies raised in donkey (Jackson ImmunoResearch)  
514 in 1%NDS/TBST were incubated for 4 hours at room temperature, and following a series of  
515 washes, sections were counterstained with DAPI (1ug/mL) and mounted on slides with  
516 ProlongGold media (ThermoFisher Scientific). Tile scanning images were acquired at 10X  
517 magnification on a Zeiss AxioObserver upright fluorescence microscope with automated stage  
518 and tile-scanning capability (Microbrightfield). For identification of atlas regions for labeling  
519 quantification, acquired images were manually registered to the closest available section from  
520 the Allen Brain Mouse Reference Atlas<sup>21</sup> (ImageJ) using DAPI fluorescence of the section  
521 outline and major neuroanatomical structures to guide fitting. Analysis participants were blinded

522 to injection conditions, and independent adjustment of atlas registration maps did not  
523 substantially impact counting results. Cell counting was performed by two independent  
524 reviewers on every 6<sup>th</sup> 40 micrometer tissue section throughout the brain, and total cell count  
525 estimates were derived by multiplying the number of counted cells by 6. Multichannel  
526 immunofluorescence microscopy to identify starter cell populations, neuronal identity, and other  
527 high-resolution imaging was conducted by acquiring Z-stacks through the target region with a  
528 Zeiss LSM710 confocal microscope.

529

#### 530 Statistics and reproducibility

531 Stereotaxic injections were repeated in 3 independent cohorts (litters) of animals for each  
532 injection location, and both male and female mice were used. Sample sizes were established  
533 based upon similar studies in the literature and were not pre-determined. Cell counters were  
534 blinded to injection location, and counts were performed independently by two reviewers. All  
535 statistical tests were performed using Graphpad Prism software and details of individual tests  
536 are described in figure legends.

537

#### 538 Data availability statement

539 The data that support the findings of this study are available from the corresponding author  
540 upon reasonable request.
